# Supplementary material
Source: publisher site journal article supplement (https://www.dovepress.com/article/536479)
Supplement: Supplementary file 1 [file Supplementary%20materials.docx]

**Supplemental Fig. 1** Establishment of EVs gate using flow cytometry

**
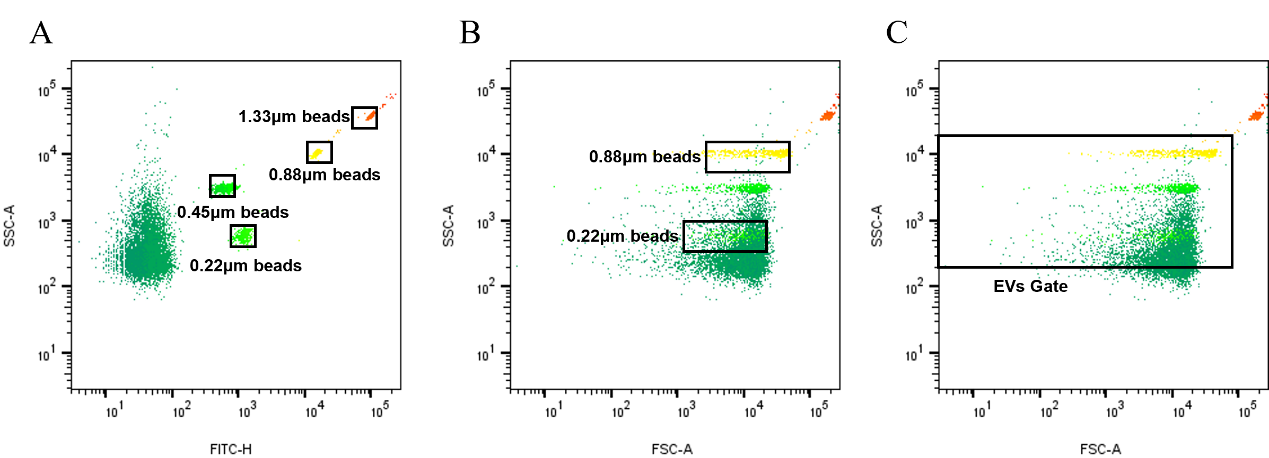
**

**Supplemental Fig. 1** According to the instructions, use the SPHEROTM Flow Cytometry Nano Fluorescent Size Standard Kit to establish the EVs gate. **A.** The kit consists of fluorescent beads with 4 different diameters from 0.22μm to 1.33μm. **B.** The upper limit of the EVs gate was established according to 0.88 µm beads, The lowest detectable limit of the EVs gate was established according to 0.22 µm beads. **C.** The EVs gate is finally determined according to the upper and lowest detectable limit of beads.

**Supplemental Fig. 2** Establishment of CD55 positive circulating EVs and EVs subsets gate using flow cytometry

**
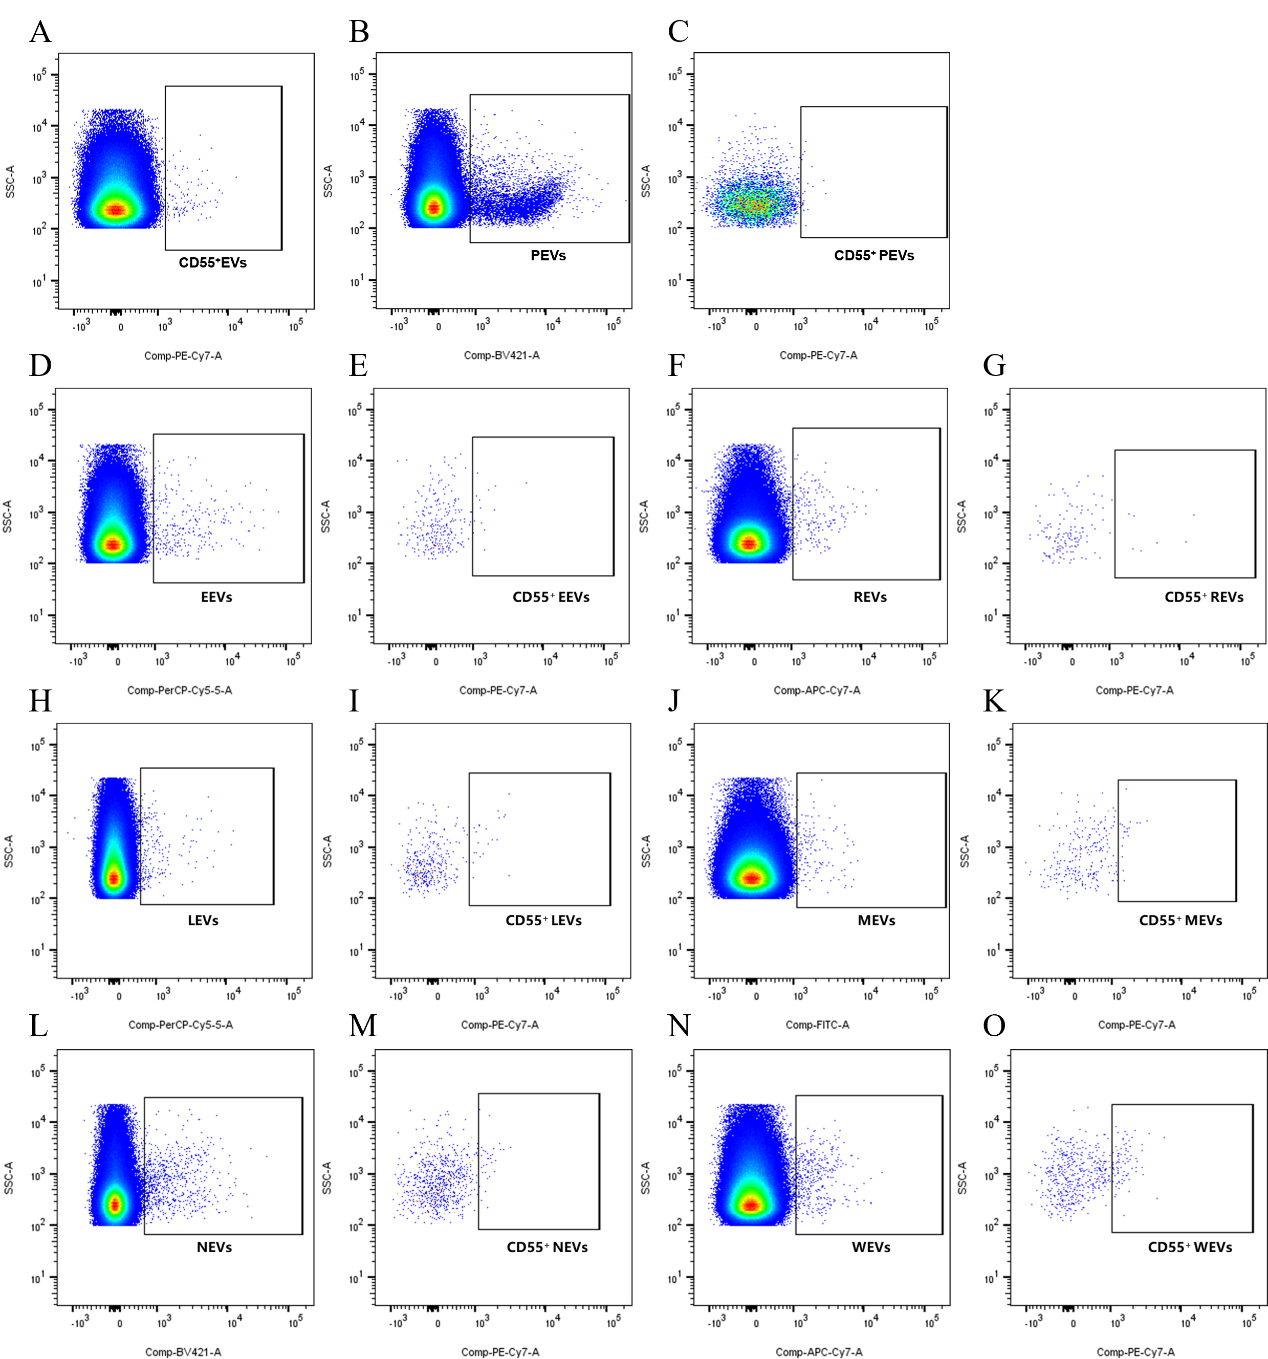
**

**Supplemental Fig. 2** Gating strategy and representative images for the detection of EVs in the Flow Cytometry analysis. EVs detection is carried out in two tubes. First tube: **A.** PE-Cy7 positive subgroup represents CD55 positive EVs. **B.** BV421 positive subgroup represents PEVs. **C.** PE-Cy7 and BV421 double positive subgroups represent CD55 positive PEVs. **D.** PerCP-Cy5.5 positive subgroup represents EEVs. **E.** PE-Cy7 and PerCP-Cy5.5 double positive subgroups represent CD55 positive EEVs. **F.** APC-Cy7 positive subgroup represents REVs. **G.** PE-Cy7 and APC-Cy7 double positive subgroups represent CD55 positive REVs. Second tube: **H.** PerCP-Cy5.5 positive subgroup represents LEVs. **I.** PE-Cy7 and PerCP-Cy5.5 double positive subgroups represent CD55 positive LEVs. **J.** FITC positive subgroup represents MEVs. **K.** PE-Cy7 and FITC double positive subgroups represent CD55 positive MEVs. **L.** BV421 positive subgroup represents NEVs. **M.** PE-Cy7 and BV421 double positive subgroups represent CD55 positive NEVs. **N.** APC-Cy7 positive subgroup represents WEVs. **O.** PE-Cy7 and APC-Cy7 double positive subgroups represent CD55 positive WEVs.
